# Supplementary material for: A model of segmental duplication formation in Drosophila melanogaster
Source: HighWire-hosted journal article supplement (doi:10.1101/gr.6208307), 2007-08-28
Supplement: FigureS1_Identitydistribution_new.pdf [file FigureS1_Identitydistribution_new.pdf]

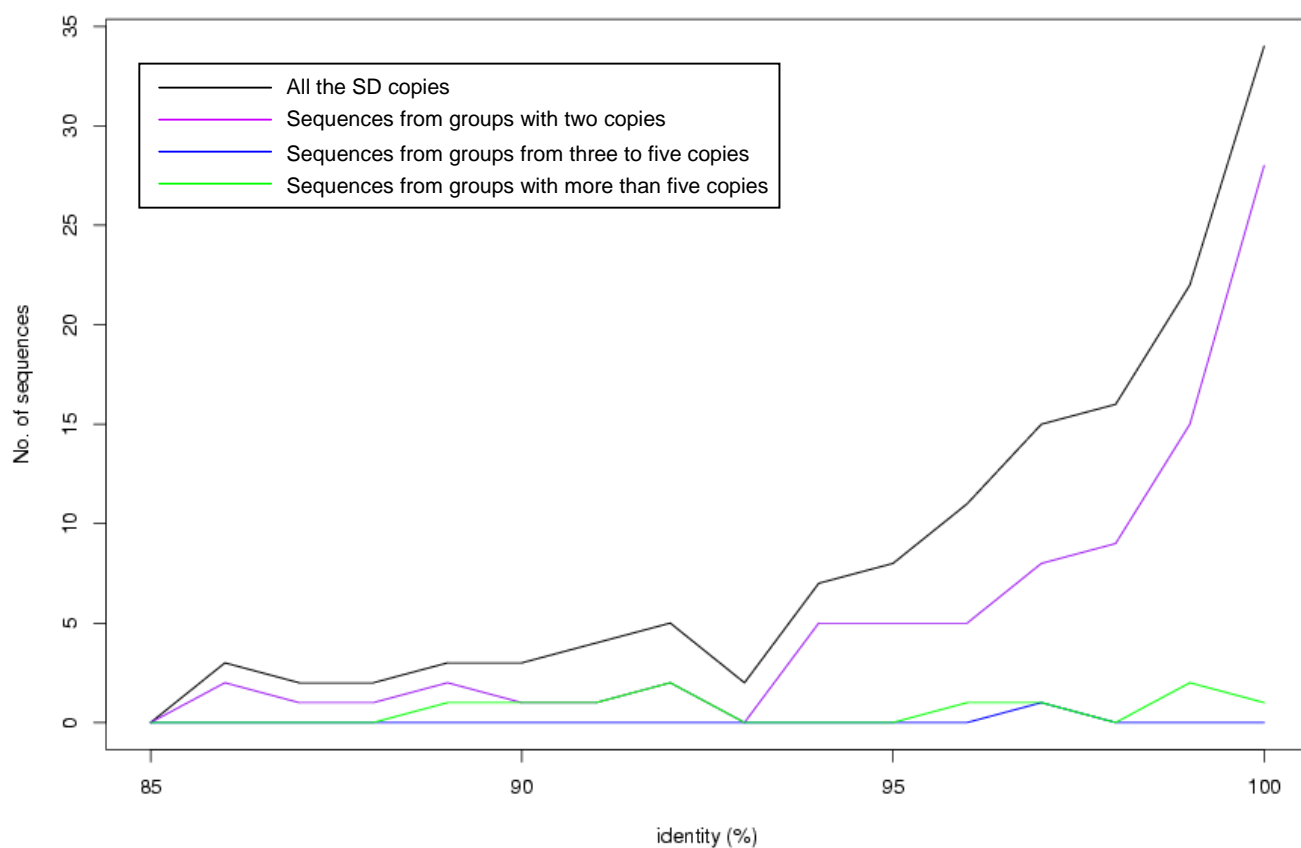

**Fig. S1: Distribution of SD identities.**

The black line corresponds to all detected SDs. The three color lines correspond respectively to values of sequences belonging to groups with two; from three to five; and more than five sequences.
