# Supplementary material for: A model of segmental duplication formation in Drosophila melanogaster
Source: HighWire-hosted journal article supplement (doi:10.1101/gr.6208307), 2007-08-28
Supplement: FigureS2_Sizedistribution_new.pdf [file FigureS2_Sizedistribution_new.pdf]

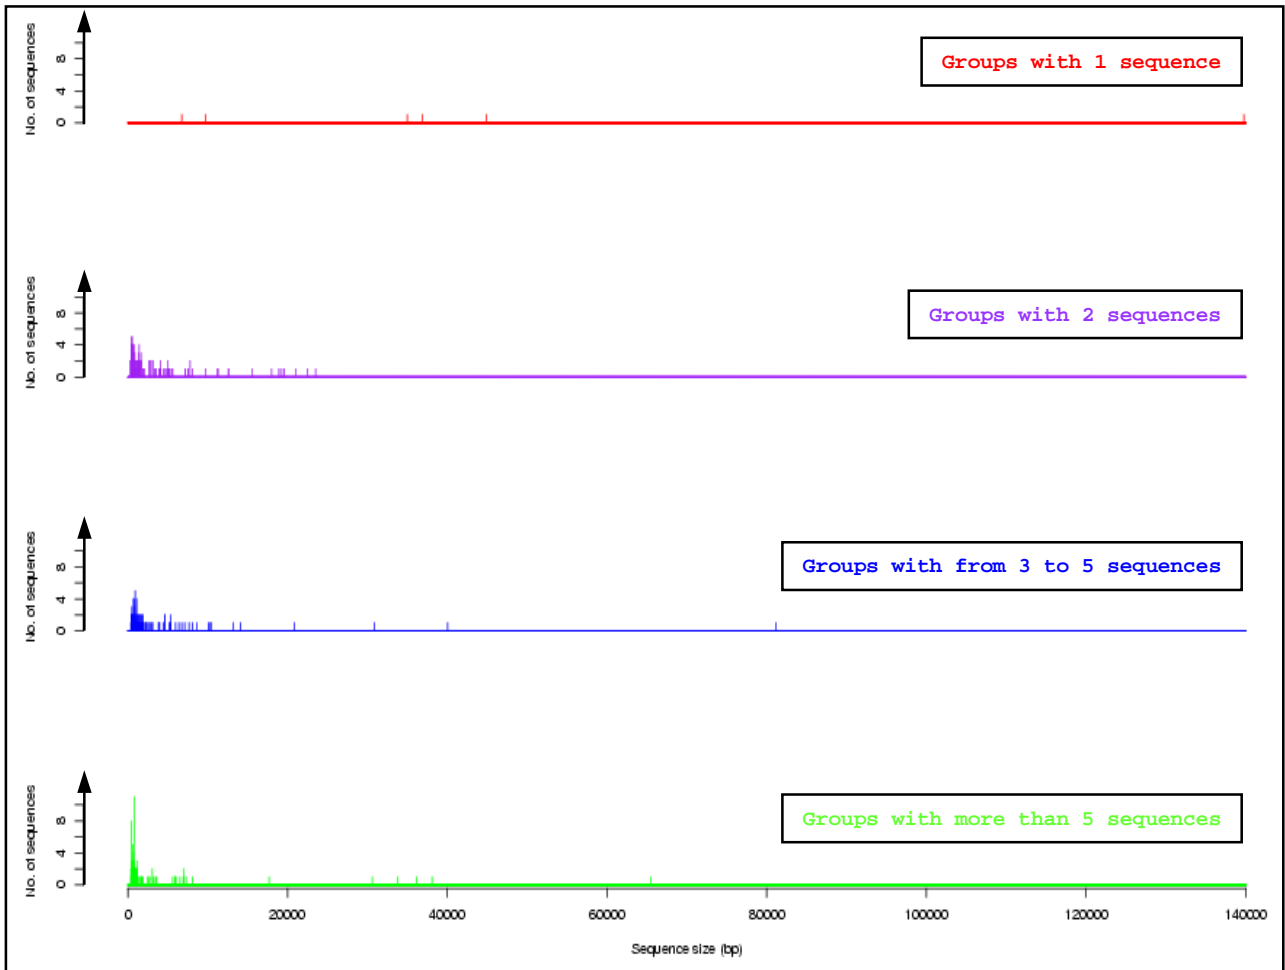

**Fig. S2: Distributions of SD sizes.**

Each histogram corresponds to the size distribution of sequences belonging to groups with : one; two; three to five; and more than five sequences.
