# Supplementary material for: A model of segmental duplication formation in Drosophila melanogaster
Source: HighWire-hosted journal article supplement (doi:10.1101/gr.6208307), 2007-08-28
Supplement: FigureS4_groupsOneseq_new.pdf [file FigureS4_groupsOneseq_new.pdf]

**Fig. S4: Analysis of some single sequence groups.**

Group n°113

|                      |                          |
|----------------------|--------------------------|
| Sequence size        | 6748 bp                  |
| Sequence identity    | 99.36%                   |
| Gene coverage        | 10.71% (Rhomboid-4)      |
| TE coverage          | 0.00%                    |
| Satellite coverage   | 33.32%                   |
| Chromosomal location | X                        |
| Cytolocation         | 10C9-10 (central region) |

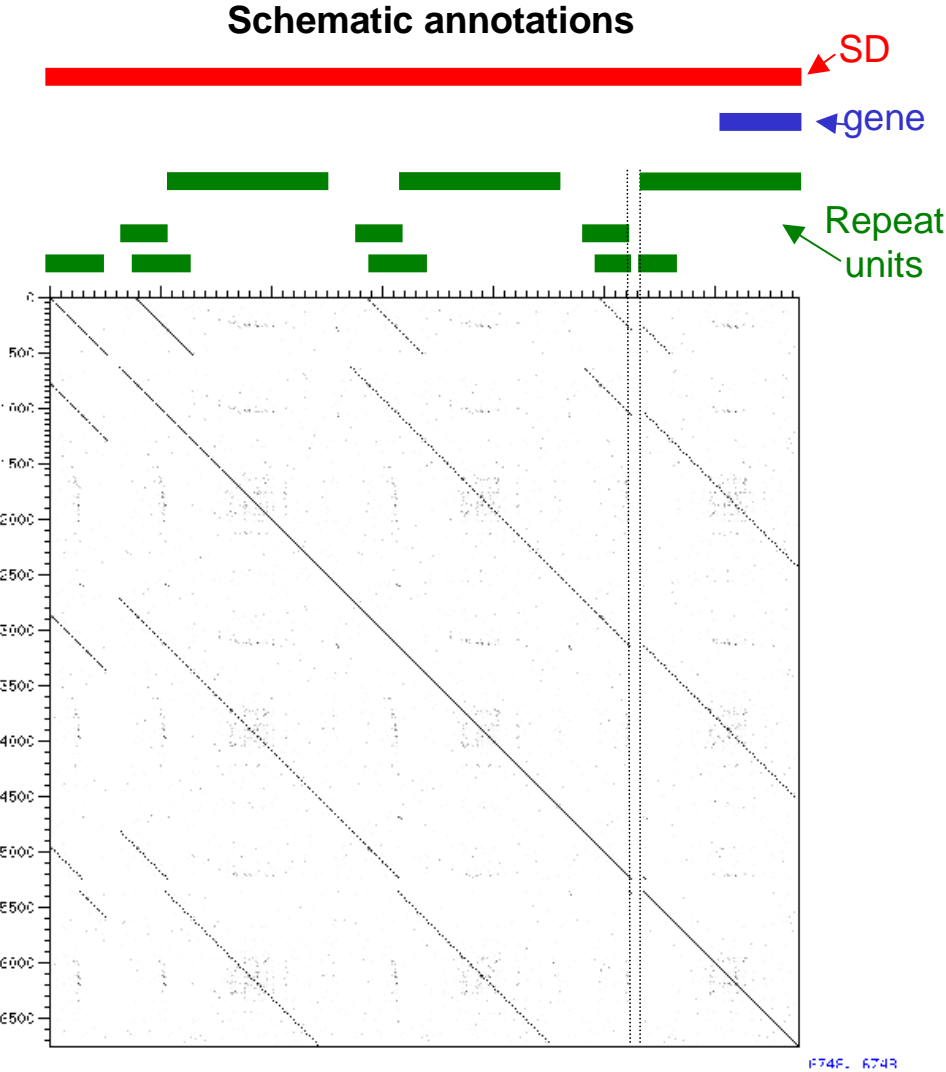

**Dotplot of the detected sequence with itself**

## Group n°122

|                      |                       |
|----------------------|-----------------------|
| Sequence size        | 44905 bp              |
| Sequence identity    | 90.64%                |
| Gene coverage        | 94.75% (CG32580)      |
| TE coverage          | 0.00%                 |
| Satellite coverage   | 2.89%                 |
| Chromosomal location | X                     |
| Cytolocation         | 14A6 (central region) |

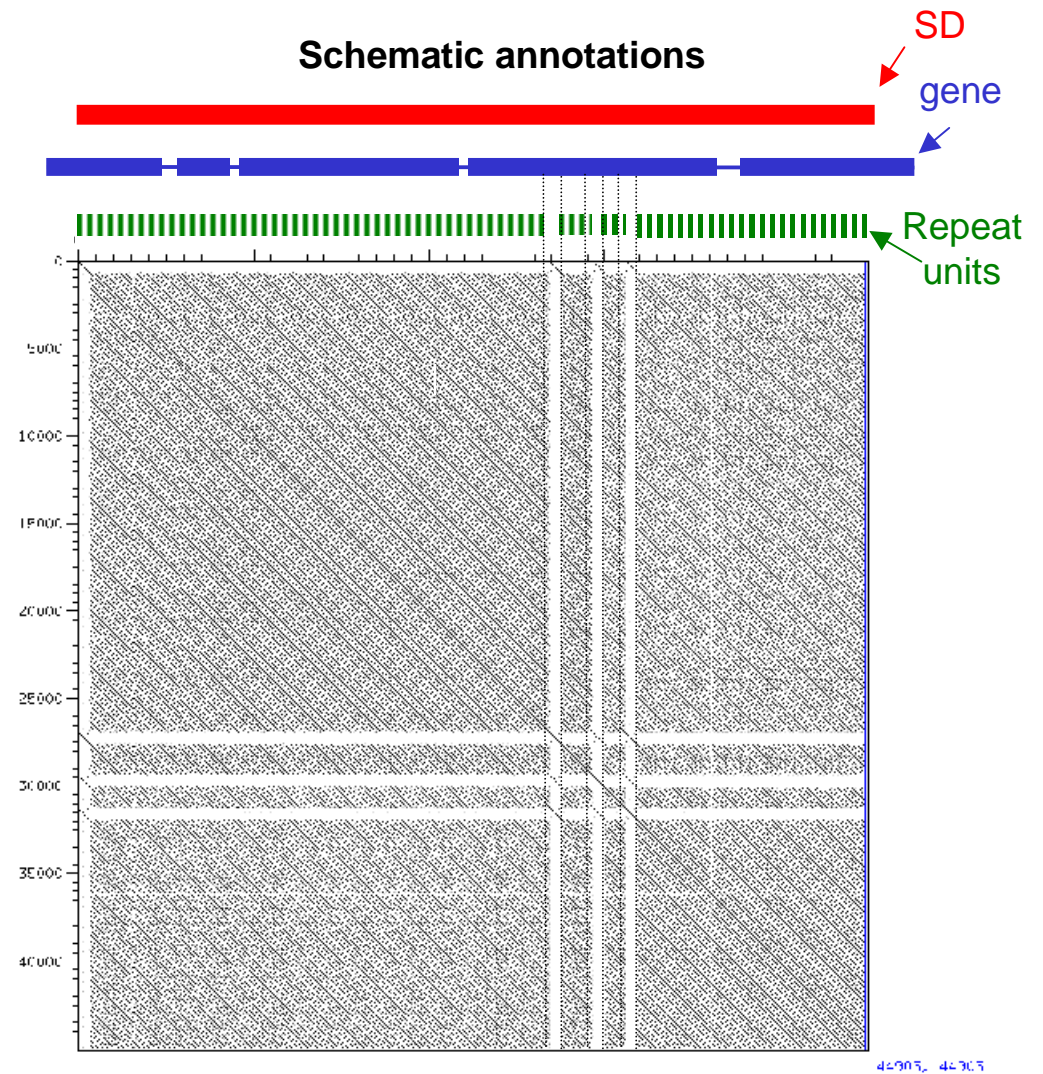

**Dotplot of the detected sequence with itself**

## Group n°12

|                      |                 |
|----------------------|-----------------|
| Sequence size        | 139729 bp       |
| Sequence identity    | 98.81%          |
| Gene coverage        | 92.00%(Histone) |
| TE coverage          | 14.72% (roo)    |
| Satellite coverage   | 30.60%          |
| Chromosomal location | 2L              |
| Cytolocation         | 39D3-E1         |

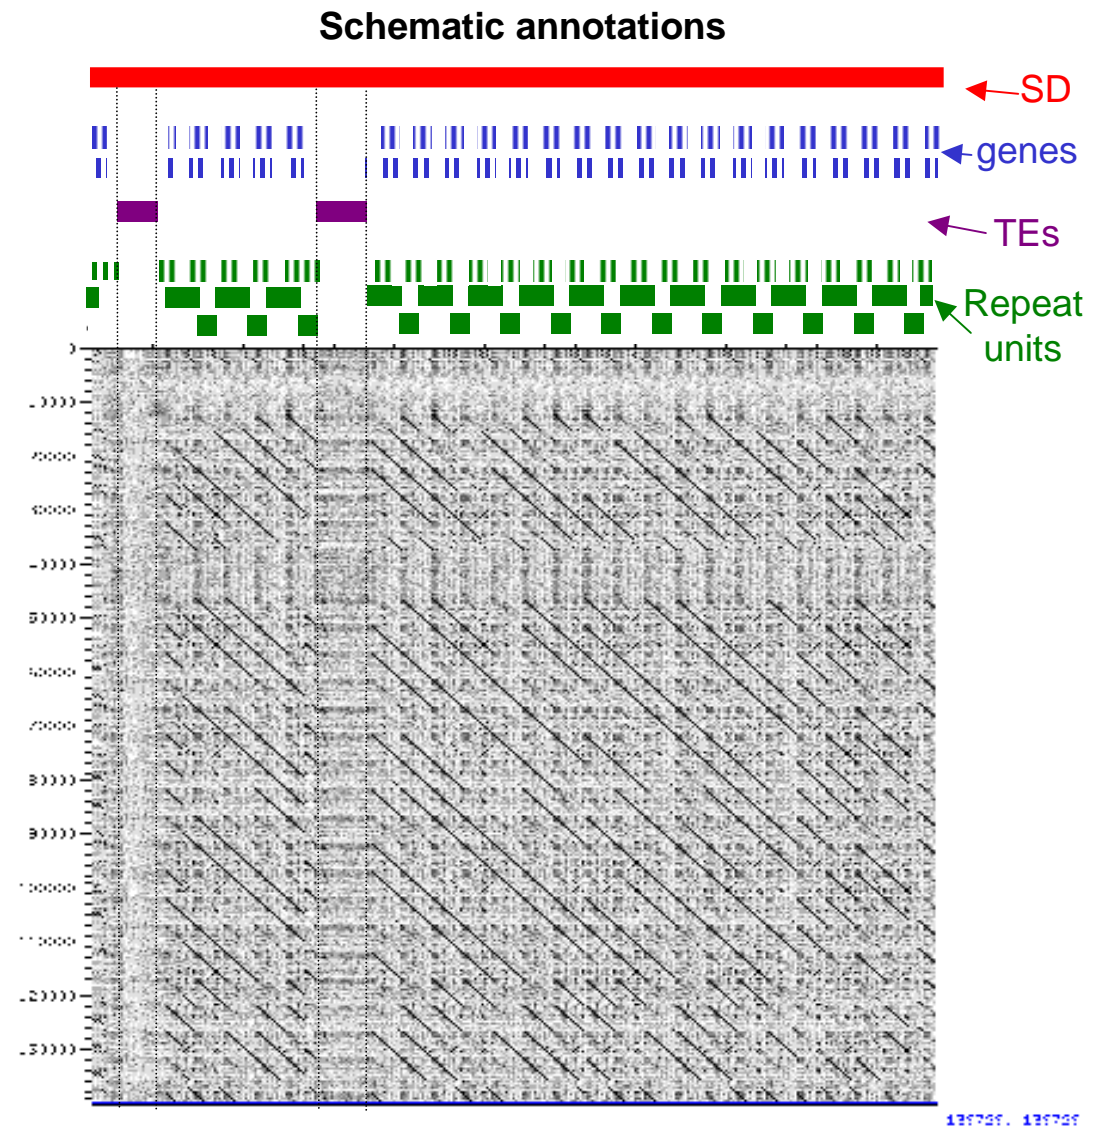

**Dotplot of the detected sequence with itself**
